# Supplementary material for: Cryophysiology of coral microfragments: effects of chilling and cryoprotectant toxicity
Source: PeerJ. 2024 Nov 11;12:e18447. doi: 10.7717/peerj.18447 (PMC11562774; doi:10.7717/peerj.18447)
Supplement: Supplemental Information 2 — Raw dataset [file peerj-12-18447-s002.xlsx]

## Sheet: Health metrics and Yield
Figure 1 raw data
Genotype	Treatment	Assessment time	Average 1:Y	Health Score
145	Chill	1	0.589	4
146	Chill	1	0.634	4
147	Chill	1	0.571	3.5
148	Chill	1	0.643333	4.5
149	Chill	1	0.588	4
150	Chill	1	0.605333	4.5
151	Chill	1	0.625	3.5
154	Chill	1	0.581333	4
145	Chill	2	0.547	3.5
146	Chill	2	0.613333	4
147	Chill	2	0.607	3.5
148	Chill	2	0.597333	4
149	Chill	2	0.605	4
150	Chill	2	0.636667	4.5
151	Chill	2	0.588667	3.5
154	Chill	2	0.526667	3
145	Chill	3	0.622333	4
146	Chill	3	0.699333	4.5
147	Chill	3	0.655333	4
148	Chill	3	0.663667	4
149	Chill	3	0.648	5
150	Chill	3	0.639333	5
151	Chill	3	0.641333	4
154	Chill	3	0.621333	3
145	Chill	4	0.602	4
146	Chill	4	0.661333	4.5
147	Chill	4	0.634	4.5
148	Chill	4	0.645	5
149	Chill	4	0.641667	5
150	Chill	4	0.663	5
151	Chill	4	0.637667	5
154	Chill	4	0.625667	3.5
145	Control	1	0.607	5
146	Control	1	0.659333	4
147	Control	1	0.656	5
148	Control	1	0.633	5
149	Control	1	0.615667	5
150	Control	1	0.633	5
151	Control	1	0.629	5
152	Control	1	0.624667	5
153	Control	1	0.615667	5
154	Control	1	0.617333	5
155	Control	1	0.603	5
145	Control	2	0.678	5
146	Control	2	0.664	4
147	Control	2	0.632333	5
148	Control	2	0.562333	5
149	Control	2	0.636333	5
150	Control	2	0.656	5
151	Control	2	0.617333	5
152	Control	2	0.639667	5
153	Control	2	0.615	5
154	Control	2	0.632	5
155	Control	2	0.627333	5
145	Control	3	0.643333	5
146	Control	3	0.674667	4.5
147	Control	3	0.667667	5
148	Control	3	0.659333	5
149	Control	3	0.654	5
150	Control	3	0.665667	5
151	Control	3	0.650333	5
152	Control	3	0.649667	5
153	Control	3	0.655667	5
154	Control	3	0.647333	5
155	Control	3	0.651	5
145	Control	4	0.643667	5
146	Control	4	0.659333	4.5
147	Control	4	0.645	5
148	Control	4	0.657667	5
149	Control	4	0.647667	5
150	Control	4	0.659333	5
151	Control	4	0.662	5
152	Control	4	0.656333	5
153	Control	4	0.672	5
154	Control	4	0.672667	5
155	Control	4	0.665	5
145	Dead	1	0.0666667	2
146	Dead	1	0.158667	2
147	Dead	1	0.168333	0
148	Dead	1	0.00866667	2
149	Dead	1	0.00666667	1
150	Dead	1	0	0
151	Dead	1	0.00433333	1
152	Dead	1	0.003	0
153	Dead	1	0	2
154	Dead	1	0.0156667	2
155	Dead	1	0.00633333	1
145	Dead	2	0.456333	1
146	Dead	2	0.244333	1
147	Dead	2	0.258667	0
148	Dead	2	0.00166667	1
149	Dead	2	0.00133333	1
150	Dead	2	0	0
151	Dead	2	0	1
152	Dead	2	0.00833333	0
153	Dead	2	0	2
154	Dead	2	0	1
155	Dead	2	0.00433333	1
145	Dead	3	0.124	0
146	Dead	3	0.0733333	0
147	Dead	3	0	0
148	Dead	3	0.0396667	0
149	Dead	3	0.0423333	0
150	Dead	3	0.0566667	0
151	Dead	3	0.0506667	0
152	Dead	3	0.037	0
153	Dead	3	0	0
154	Dead	3	0.034	0
155	Dead	3	0	0
145	Dead	4	0.188	0
146	Dead	4	0.276667	0
147	Dead	4	0	0
148	Dead	4	0.198667	0
149	Dead	4	0.29	0
150	Dead	4	0	0
151	Dead	4	0.137	0
152	Dead	4	0	0
153	Dead	4	0.054	0
154	Dead	4	0.0113333	0
155	Dead	4	0	0
145	VS	1	0.618333	3
146	VS	1	0.736667	4.5
147	VS	1	0.608333	3.5
148	VS	1	0.643333	4
148	VS	1	0.641333	4.5
149	VS	1	0.594	2.5
149	VS	1	0.606667	4.5
150	VS	1	0.595667	4
150	VS	1	0.576	3
151	VS	1	0.630333	4.5
151	VS	1	0.631	3
152	VS	1	0.575333	4.5
154	VS	1	0.587667	3.5
154	VS	1	0.604667	4
155	VS	1	0.601	4
145	VS	2	0.550333	2
146	VS	2	0.713667	4
147	VS	2	0.737533	3.5
148	VS	2	0.612667	4
148	VS	2	0.581	4.5
149	VS	2	0.620333	2.5
149	VS	2	0.598	4.5
150	VS	2	0.633	4
150	VS	2	0.604	2.5
151	VS	2	0.578333	4
151	VS	2	0.58	2.5
152	VS	2	0.608	4.5
154	VS	2	0.599333	3.5
154	VS	2	0.625333	3.5
155	VS	2	0.53	3
145	VS	3	0.653	2
146	VS	3	0.669333	3
147	VS	3	0.637	3.5
148	VS	3	0.667	4.5
148	VS	3	0.659	5
149	VS	3	0.649667	3
149	VS	3	0.666667	3.5
150	VS	3	0.644333	4
150	VS	3	0.600667	2.5
151	VS	3	0.648667	4
151	VS	3	0.640333	3.5
152	VS	3	0.632667	5
154	VS	3	0.605	3.5
154	VS	3	0.636333	3.5
155	VS	3	0.604333	2
145	VS	4	0.592667	4
146	VS	4	0.626667	3.5
147	VS	4	0.535	3
148	VS	4	0.675667	5
148	VS	4	0.600333	5
149	VS	4	0.652667	4
149	VS	4	0.65	4
150	VS	4	0.649333	4.5
150	VS	4	0.641	3.5
151	VS	4	0.648	4
151	VS	4	0.637667	4
152	VS	4	0.655333	5
154	VS	4	0.623333	4
154	VS	4	0.616333	4
155	VS	4	0.622	4

## Sheet: Growth data
Post-experiment regrowth data for Porites compressa
Genotype	Treatment	Days to grow
143	Chilled	91
144	Chilled	91
145	Chilled	57
146	Chilled	50
147	Chilled	57
148	Chilled	57
149	Chilled	59
151	Chilled	64
150	Chilled	59
9	Chilled	65
143	Control	91
144	Control	91
145	Control	53
146	Control	44
147	Control	65
148	Control	53
149	Control	59
151	Control	44
150	Control	43
148	VS	42
148	VS	66
149	VS	82
149	VS	56
150	VS	56
152	VS	69
154	VS	69
154	VS	69
158	VS	42
160	VS	42

## Sheet: Imaging PAM data
Figure 4 raw data for Imaging PAM
Date	Genotype	Treatment	Y(II)1	Y(II)2	Y(II)3	Y(II)4	Y(II)5	Average 1:Y
2022-06-13	180	Unbleached	0.582	0.573	0.58	0.58	0.568	0.5766
2022-06-13	181	Unbleached	0.563	0.566	0.557	0.563	0.543	0.5584
2022-06-13	183	Unbleached	0.571	0.579	0.575	0.576	0.559	0.572
2022-07-07	192	Unbleached	0.539	0.535	0.531	0.544	0.532	0.5362
2022-07-07	193	Unbleached	0.578	0.57	0.573	0.575	0.577	0.5746
2022-07-07	194	Unbleached	0.562	0.563	0.559	0.566	0.564	0.5628
2022-07-07	195	Unbleached	0.541	0.538	0.514	0.539	0.539	0.5342
2022-07-14	196	Unbleached	0.598	0.593	0.595	0.593	0.595	0.5948
2022-07-14	197	Unbleached	0.575	0.578	0.587	0.587	0.589	0.5832
2022-06-13	180	Bleached	0	0	0	0	0	0
2022-06-13	181	Bleached	0	0	0	0	0	0
2022-06-13	183	Bleached	0	0	0	0	0	0
2022-07-07	192	Bleached	0	0	0	0	0	0
2022-07-07	193	Bleached	0.046	0	0.048	0.052	0	0.0292
2022-07-07	194	Bleached	0	0	0	0.032	0	0.0064
2022-07-07	195	Bleached	0	0.029	0.028	0.028	0	0.017
2022-07-14	196	Bleached	0	0	0	0	0	0
2022-07-14	197	Bleached	0.04	0.04	0	0.112	0.119	0.0622

## Sheet: MFI data
Figure 4 data for confocal imaging of bleaching
Genotype	Controls (MFI)	Bleached (MFI)
165	248.549	42.0713
175	154.618	56.0018
176	195.28	56.0018
177	205.851	43.9778
178	207.197	44.3691
172	213.864	55.813
174	292.632	45.2056
181	145.253	46.0579
180	166.935	78.9824
182	189.26	47.6527
183	316.234	43.8393
185	174.925	44.3371
184	189.675	37.9798
187	170.617	27.1072
191	106.506	32.5424
189	153.425	30.3446
192	228.528	51.9952
193	348.906	82.1695
194	374.415	48.12
195	383.851	49.3827
196	321.628	45.3263
197	354.924	43.6738
186	62.0724	31.3983
190	47.9304	31.9441
188	49.5128	32.4441

## Sheet: Raw PAM data
Experiment Date	Genotype	Treatment	Assessment time	Replicate #	1:Y
2022-01-10	145	Chill	1	1	0.589
2022-01-10	145	Chill	1	2	0.583
2022-01-10	145	Chill	1	3	0.595
2022-01-10	145	Control	1	1	0.61
2022-01-10	145	Control	1	2	0.614
2022-01-10	145	Control	1	3	0.597
2022-01-10	145	Dead	1	1	0.051
2022-01-10	145	Dead	1	2	0.141
2022-01-10	145	Dead	1	3	0.008
2022-01-10	145	LG80	1	1	0.619
2022-01-10	145	LG80	1	2	0.626
2022-01-10	145	LG80	1	3	0.61
2022-01-10	146	Chill	1	1	0.637
2022-01-10	146	Chill	1	2	0.628
2022-01-10	146	Chill	1	3	0.637
2022-01-10	146	Control	1	1	0.682
2022-01-10	146	Control	1	2	0.641
2022-01-10	146	Control	1	3	0.655
2022-01-10	146	Dead	1	1	0.307
2022-01-10	146	Dead	1	2	0.155
2022-01-10	146	Dead	1	3	0.014
2022-01-10	146	LG80	1	1	0.87
2022-01-10	146	LG80	1	2	0.639
2022-01-10	146	LG80	1	3	0.701
2022-01-10	147	Chill	1	1	0.574
2022-01-10	147	Chill	1	2	0.56
2022-01-10	147	Chill	1	3	0.579
2022-01-10	147	Control	1	1	0.622
2022-01-10	147	Control	1	2	0.656
2022-01-10	147	Control	1	3	0.69
2022-01-10	147	Dead	1	1	0.1
2022-01-10	147	Dead	1	2	0.036
2022-01-10	147	Dead	1	3	0.369
2022-01-10	147	LG80	1	1	0.602
2022-01-10	147	LG80	1	2	0.618
2022-01-10	147	LG80	1	3	0.605
2022-01-10	145	Chill	2	1	0.621
2022-01-10	145	Chill	2	2	0.62
2022-01-10	145	Chill	2	3	626
2022-01-10	145	Control	2	1	0.646
2022-01-10	145	Control	2	2	0.647
2022-01-10	145	Control	2	3	0.637
2022-01-10	145	Dead	2	1	0.058
2022-01-10	145	Dead	2	2	0.162
2022-01-10	145	Dead	2	3	0.152
2022-01-10	145	LG80	2	1	0.614
2022-01-10	145	LG80	2	2	0.607
2022-01-10	145	LG80	2	3	0.738
2022-01-10	146	Chill	2	1	0.677
2022-01-10	146	Chill	2	2	0.679
2022-01-10	146	Chill	2	3	0.742
2022-01-10	146	Control	2	1	0.673
2022-01-10	146	Control	2	2	0.679
2022-01-10	146	Control	2	3	0.672
2022-01-10	146	Dead	2	1	0
2022-01-10	146	Dead	2	2	0.22
2022-01-10	146	Dead	2	3	0
2022-01-10	146	LG80	2	1	0.609
2022-01-10	146	LG80	2	2	0.629
2022-01-10	146	LG80	2	3	0.77
2022-01-10	147	Chill	2	1	67
2022-01-10	147	Chill	2	2	0.641
2022-01-10	147	Chill	2	3	0.655
2022-01-10	147	Control	2	1	0.658
2022-01-10	147	Control	2	2	0.71
2022-01-10	147	Control	2	3	0.668
2022-01-10	147	Dead	2	1	0
2022-01-10	147	Dead	2	2	0
2022-01-10	147	Dead	2	3	0
2022-01-10	147	LG80	2	1	0.621
2022-01-10	147	LG80	2	2	0.672
2022-01-10	147	LG80	2	3	0.618
2022-01-10	145	Chill	3	1	0.606
2022-01-10	145	Chill	3	2	0.608
2022-01-10	145	Chill	3	3	0.592
2022-01-10	145	Control	3	1	0.636
2022-01-10	145	Control	3	2	0.649
2022-01-10	145	Control	3	3	0.646
2022-01-10	145	Dead	3	1	0.349
2022-01-10	145	Dead	3	2	0.215
2022-01-10	145	Dead	3	3	0
2022-01-10	145	LG80	3	1	0.585
2022-01-10	145	LG80	3	2	0.602
2022-01-10	145	LG80	3	3	0.591
2022-01-10	146	Chill	3	1	0.659
2022-01-10	146	Chill	3	2	0.654
2022-01-10	146	Chill	3	3	0.671
2022-01-10	146	Control	3	1	0.665
2022-01-10	146	Control	3	2	0.643
2022-01-10	146	Control	3	3	0.67
2022-01-10	146	Dead	3	1	0.176
2022-01-10	146	Dead	3	2	0.344
2022-01-10	146	Dead	3	3	0.319
2022-01-10	146	LG80	3	1	0.639
2022-01-10	146	LG80	3	2	0.613
2022-01-10	146	LG80	3	3	0.628
2022-01-10	147	Chill	3	1	0.639
2022-01-10	147	Chill	3	2	0.634
2022-01-10	147	Chill	3	3	0.629
2022-01-10	147	Control	3	1	0.639
2022-01-10	147	Control	3	2	0.653
2022-01-10	147	Control	3	3	0.643
2022-01-10	147	Dead	3	1	0
2022-01-10	147	Dead	3	2	0
2022-01-10	147	Dead	3	3	0
2022-01-10	147	LG80	3	1	0.546
2022-01-10	147	LG80	3	2	0.533
2022-01-10	147	LG80	3	3	0.526
2022-01-31	148	Chill	1	1	0.642
2022-01-31	148	Chill	1	2	0.637
2022-01-31	148	Chill	1	3	0.651
2022-01-31	148	Control	1	1	0.63
2022-01-31	148	Control	1	2	0.637
2022-01-31	148	Control	1	3	0.632
2022-01-31	148	LG76	1	1	0.646
2022-01-31	148	LG76	1	2	0.637
2022-01-31	148	LG76	1	3	0.647
2022-01-31	148	LG80	1	1	0.638
2022-01-31	148	LG80	1	2	0.642
2022-01-31	148	LG80	1	3	0.644
2022-01-31	151	Chill	1	1	0.628
2022-01-31	151	Chill	1	2	0.621
2022-01-31	151	Chill	1	3	0.626
2022-01-31	151	Control	1	1	0.631
2022-01-31	151	Control	1	2	0.629
2022-01-31	151	Control	1	3	0.627
2022-01-31	151	LG76	1	1	0.62
2022-01-31	151	LG76	1	2	0.638
2022-01-31	151	LG76	1	3	0.633
2022-01-31	151	LG80	1	1	0.627
2022-01-31	151	LG80	1	2	0.632
2022-01-31	151	LG80	1	3	0.634
2022-01-31	148	Chill	2	1	0.655
2022-01-31	148	Chill	2	2	0.666
2022-01-31	148	Chill	2	3	0.67
2022-01-31	148	Control	2	1	0.658
2022-01-31	148	Control	2	2	0.655
2022-01-31	148	Control	2	3	0.665
2022-01-31	148	LG76	2	1	0.67
2022-01-31	148	LG76	2	2	0.661
2022-01-31	148	LG76	2	3	0.67
2022-01-31	148	LG80	2	1	0.656
2022-01-31	148	LG80	2	2	0.661
2022-01-31	148	LG80	2	3	0.66
2022-01-31	151	Chill	2	1	0.645
2022-01-31	151	Chill	2	2	0.636
2022-01-31	151	Chill	2	3	0.643
2022-01-31	151	Control	2	1	0.652
2022-01-31	151	Control	2	2	0.648
2022-01-31	151	Control	2	3	0.651
2022-01-31	151	LG76	2	1	0.65
2022-01-31	151	LG76	2	2	0.649
2022-01-31	151	LG76	2	3	0.647
2022-01-31	151	LG80	2	1	0.644
2022-01-31	151	LG80	2	2	0.634
2022-01-31	151	LG80	2	3	0.643
2022-01-31	148	Chill	3	1	0.629
2022-01-31	148	Chill	3	2	0.664
2022-01-31	148	Chill	3	3	0.642
2022-01-31	148	Control	3	1	0.658
2022-01-31	148	Control	3	2	0.663
2022-01-31	148	Control	3	3	0.652
2022-01-31	148	LG76	3	1	0.675
2022-01-31	148	LG76	3	2	0.681
2022-01-31	148	LG76	3	3	0.671
2022-01-31	148	LG80	3	1	0.598
2022-01-31	148	LG80	3	2	0.639
2022-01-31	148	LG80	3	3	0.564
2022-01-31	151	Chill	3	1	0.629
2022-01-31	151	Chill	3	2	0.643
2022-01-31	151	Chill	3	3	0.641
2022-01-31	151	Control	3	1	0.662
2022-01-31	151	Control	3	2	0.665
2022-01-31	151	Control	3	3	0.659
2022-01-31	151	LG76	3	1	0.652
2022-01-31	151	LG76	3	2	0.649
2022-01-31	151	LG76	3	3	0.643
2022-01-31	151	LG80	3	1	0.64
2022-01-31	151	LG80	3	2	0.646
2022-01-31	151	LG80	3	3	0.627
2022-01-31	148	LG76	4	1	0.637
2022-01-31	148	LG76	4	2	0.635
2022-01-31	148	LG76	4	3	0.643
2022-01-31	148	LG80	4	1	0.621
2022-01-31	148	LG80	4	2	0.629
2022-01-31	148	LG80	4	3	0.636
2022-01-31	149	LG76	4	1	0.368
2022-01-31	149	LG76	4	2	0.471
2022-01-31	149	LG76	4	3	0.466
2022-01-31	149	LG80	4	1	0.621
2022-01-31	149	LG80	4	2	0.63
2022-01-31	149	LG80	4	3	0.626
2022-01-31	150	LG76	4	1	0.653
2022-01-31	150	LG76	4	2	0.644
2022-01-31	150	LG76	4	3	0.645
2022-01-31	150	LG80	4	1	0.644
2022-01-31	150	LG80	4	2	0.638
2022-01-31	150	LG80	4	3	0.644
2022-01-31	151	LG76	4	1	0.655
2022-01-31	151	LG76	4	2	0.658
2022-01-31	151	LG76	4	3	0.644
2022-01-31	151	LG80	4	1	0.646
2022-01-31	151	LG80	4	2	0.647
2022-01-31	151	LG80	4	3	0.649
2022-02-01	149	Chill	1	1	0.59
2022-02-01	149	Chill	1	2	0.575
2022-02-01	149	Chill	1	3	0.599
2022-02-01	149	Control	1	1	0.611
2022-02-01	149	Control	1	2	0.624
2022-02-01	149	Control	1	3	0.612
2022-02-01	149	Dead	1	1	0.02
2022-02-01	149	Dead	1	2	0
2022-02-01	149	Dead	1	3	0
2022-02-01	149	LG76	1	1	0.591
2022-02-01	149	LG76	1	2	0.6
2022-02-01	149	LG76	1	3	0.591
2022-02-01	149	LG80	1	1	0.603
2022-02-01	149	LG80	1	2	0.612
2022-02-01	149	LG80	1	3	0.605
2022-02-01	150	Chill	1	1	0.618
2022-02-01	150	Chill	1	2	0.591
2022-02-01	150	Chill	1	3	0.607
2022-02-01	150	Control	1	1	0.624
2022-02-01	150	Control	1	2	0.637
2022-02-01	150	Control	1	3	0.638
2022-02-01	150	Dead	1	1	0
2022-02-01	150	Dead	1	2	0
2022-02-01	150	Dead	1	3	0
2022-02-01	150	LG76	1	1	0.579
2022-02-01	150	LG76	1	2	0.602
2022-02-01	150	LG76	1	3	0.606
2022-02-01	150	LG80	1	1	0.579
2022-02-01	150	LG80	1	2	0.569
2022-02-01	150	LG80	1	3	0.58
2022-02-01	149	Chill	2	1	0.625
2022-02-01	149	Chill	2	2	0.672
2022-02-01	149	Chill	2	3	0.647
2022-02-01	149	Control	2	1	0.648
2022-02-01	149	Control	2	2	0.658
2022-02-01	149	Control	2	3	0.656
2022-02-01	149	Dead	2	1	0.098
2022-02-01	149	Dead	2	2	0
2022-02-01	149	Dead	2	3	0.029
2022-02-01	149	LG76	2	1	0.648
2022-02-01	149	LG76	2	2	0.648
2022-02-01	149	LG76	2	3	0.653
2022-02-01	149	LG80	2	1	0.756
2022-02-01	149	LG80	2	2	0.614
2022-02-01	149	LG80	2	3	0.63
2022-02-01	150	Chill	2	1	0.642
2022-02-01	150	Chill	2	2	0.638
2022-02-01	150	Chill	2	3	0.638
2022-02-01	150	Control	2	1	0.657
2022-02-01	150	Control	2	2	0.66
2022-02-01	150	Control	2	3	0.68
2022-02-01	150	Dead	2	1	0.02
2022-02-01	150	Dead	2	2	0.126
2022-02-01	150	Dead	2	3	0.024
2022-02-01	150	LG76	2	1	0.641
2022-02-01	150	LG76	2	2	0.644
2022-02-01	150	LG76	2	3	0.648
2022-02-01	150	LG80	2	1	0.624
2022-02-01	150	LG80	2	2	0.541
2022-02-01	150	LG80	2	3	0.637
2022-02-01	149	Chill	3	1	0.639
2022-02-01	149	Chill	3	2	0.635
2022-02-01	149	Chill	3	3	0.651
2022-02-01	149	Control	3	1	0.637
2022-02-01	149	Control	3	2	0.653
2022-02-01	149	Control	3	3	0.653
2022-02-01	149	Dead	3	1	0.316
2022-02-01	149	Dead	3	2	0.274
2022-02-01	149	Dead	3	3	0.28
2022-02-01	149	LG76	3	1	0.654
2022-02-01	149	LG76	3	2	0.658
2022-02-01	149	LG76	3	3	0.646
2022-02-01	149	LG80	3	1	0.651
2022-02-01	149	LG80	3	2	0.662
2022-02-01	149	LG80	3	3	0.637
2022-02-01	150	Chill	3	1	0.663
2022-02-01	150	Chill	3	2	0.663
2022-02-01	150	Chill	3	3	0.663
2022-02-01	150	Control	3	1	0.667
2022-02-01	150	Control	3	2	0.658
2022-02-01	150	Control	3	3	0.653
2022-02-01	150	Dead	3	1	0
2022-02-01	150	Dead	3	2	0
2022-02-01	150	Dead	3	3	0
2022-02-01	150	LG76	3	1	0.649
2022-02-01	150	LG76	3	2	0.645
2022-02-01	150	LG76	3	3	0.654
2022-02-01	150	LG80	3	1	0.65
2022-02-01	150	LG80	3	2	0.636
2022-02-01	150	LG80	3	3	0.637
2022-02-01	148	LG76	4	1	0.637
2022-02-01	148	LG76	4	2	0.635
2022-02-01	148	LG76	4	3	0.643
2022-02-01	148	LG80	4	1	0.621
2022-02-01	148	LG80	4	2	0.629
2022-02-01	148	LG80	4	3	0.636
2022-02-01	149	LG76	4	1	0.368
2022-02-01	149	LG76	4	2	0.471
2022-02-01	149	LG76	4	3	0.466
2022-02-01	149	LG80	4	1	0.621
2022-02-01	149	LG80	4	2	0.63
2022-02-01	149	LG80	4	3	0.626
2022-02-01	150	LG76	4	1	0.653
2022-02-01	150	LG76	4	2	0.644
2022-02-01	150	LG76	4	3	0.645
2022-02-01	150	LG80	4	1	0.644
2022-02-01	150	LG80	4	2	0.638
2022-02-01	150	LG80	4	3	0.644
2022-02-01	151	LG76	4	1	0.655
2022-02-01	151	LG76	4	2	0.658
2022-02-01	151	LG76	4	3	0.644
2022-02-01	151	LG80	4	1	0.646
2022-02-01	151	LG80	4	2	0.647
2022-02-01	151	LG80	4	3	0.649
2022-02-15	152	Chill	1	1	0.587
2022-02-15	152	Chill	1	2	0.6
2022-02-15	152	Chill	1	3	0.601
2022-02-15	152	Control	1	1	0.619
2022-02-15	152	Control	1	2	0.628
2022-02-15	152	Control	1	3	0.627
2022-02-15	152	Dead	1	1	0
2022-02-15	152	Dead	1	2	0.003
2022-02-15	152	Dead	1	3	0.006
2022-02-15	152	LG76	1	1	0.593
2022-02-15	152	LG76	1	2	0.561
2022-02-15	152	LG76	1	3	0.572
2022-02-15	152	LG80	1	1	0.609
2022-02-15	152	LG80	1	2	0.6
2022-02-15	152	LG80	1	3	0.569
2022-02-15	153	Chill	1	1	0.549
2022-02-15	153	Chill	1	2	0.568
2022-02-15	153	Chill	1	3	0.539
2022-02-15	153	Control	1	1	0.617
2022-02-15	153	Control	1	2	0.616
2022-02-15	153	Control	1	3	0.614
2022-02-15	153	Dead	1	1	0
2022-02-15	153	Dead	1	2	0
2022-02-15	153	Dead	1	3	0
2022-02-15	153	LG76	1	1	0.61
2022-02-15	153	LG76	1	2	0.604
2022-02-15	153	LG76	1	3	0.607
2022-02-15	153	LG80	1	1	0.596
2022-02-15	153	LG80	1	2	0.591
2022-02-15	153	LG80	1	3	0.596
2022-02-15	154	Chill	1	1	0.578
2022-02-15	154	Chill	1	2	0.582
2022-02-15	154	Chill	1	3	0.584
2022-02-15	154	Control	1	1	0.61
2022-02-15	154	Control	1	2	0.628
2022-02-15	154	Control	1	3	0.614
2022-02-15	154	Dead	1	1	0
2022-02-15	154	Dead	1	2	0.012
2022-02-15	154	Dead	1	3	0.035
2022-02-15	154	LG76	1	1	0.589
2022-02-15	154	LG76	1	2	0.61
2022-02-15	154	LG76	1	3	0.564
2022-02-15	154	LG80	1	1	0.611
2022-02-15	154	LG80	1	2	0.611
2022-02-15	154	LG80	1	3	0.592
2022-02-15	155	Chill	1	1	0.577
2022-02-15	155	Chill	1	2	0.583
2022-02-15	155	Chill	1	3	0.583
2022-02-15	155	Control	1	1	0.604
2022-02-15	155	Control	1	2	0.6
2022-02-15	155	Control	1	3	0.605
2022-02-15	155	Dead	1	1	0
2022-02-15	155	Dead	1	2	0
2022-02-15	155	Dead	1	3	0.019
2022-02-15	155	LG76	1	1	0.612
2022-02-15	155	LG76	1	2	0.602
2022-02-15	155	LG76	1	3	0.602
2022-02-15	155	LG80	1	1	0.59
2022-02-15	155	LG80	1	2	0.611
2022-02-15	155	LG80	1	3	0.602
2022-02-15	152	Chill	2	1	0.325
2022-02-15	152	Chill	2	2	0.274
2022-02-15	152	Chill	2	3	0.257
2022-02-15	152	Control	2	1	0.648
2022-02-15	152	Control	2	2	0.649
2022-02-15	152	Control	2	3	0.652
2022-02-15	152	Dead	2	1	0
2022-02-15	152	Dead	2	2	0.06
2022-02-15	152	Dead	2	3	0.051
2022-02-15	152	LG76	2	1	0.636
2022-02-15	152	LG76	2	2	0.633
2022-02-15	152	LG76	2	3	0.629
2022-02-15	152	LG80	2	1	0.055
2022-02-15	152	LG80	2	2	0.038
2022-02-15	152	LG80	2	3	0.053
2022-02-15	153	Chill	2	1	0.078
2022-02-15	153	Chill	2	2	0.17
2022-02-15	153	Chill	2	3	0.129
2022-02-15	153	Control	2	1	0.656
2022-02-15	153	Control	2	2	0.659
2022-02-15	153	Control	2	3	0.652
2022-02-15	153	Dead	2	1	0
2022-02-15	153	Dead	2	2	0
2022-02-15	153	Dead	2	3	0
2022-02-15	153	LG76	2	1	0.349
2022-02-15	153	LG76	2	2	0.309
2022-02-15	153	LG76	2	3	0.256
2022-02-15	153	LG80	2	1	0.021
2022-02-15	153	LG80	2	2	0
2022-02-15	153	LG80	2	3	0.025
2022-02-15	154	Chill	2	1	0.618
2022-02-15	154	Chill	2	2	0.623
2022-02-15	154	Chill	2	3	0.623
2022-02-15	154	Control	2	1	0.652
2022-02-15	154	Control	2	2	0.647
2022-02-15	154	Control	2	3	0.643
2022-02-15	154	Dead	2	1	0.025
2022-02-15	154	Dead	2	2	0.05
2022-02-15	154	Dead	2	3	0.027
2022-02-15	154	LG76	2	1	0.603
2022-02-15	154	LG76	2	2	0.61
2022-02-15	154	LG76	2	3	0.602
2022-02-15	154	LG80	2	1	0.639
2022-02-15	154	LG80	2	2	0.622
2022-02-15	154	LG80	2	3	0.648
2022-02-15	155	Chill	2	1	0.225
2022-02-15	155	Chill	2	2	0.273
2022-02-15	155	Chill	2	3	0.205
2022-02-15	155	Control	2	1	0.644
2022-02-15	155	Control	2	2	0.655
2022-02-15	155	Control	2	3	0.654
2022-02-15	155	Dead	2	1	0
2022-02-15	155	Dead	2	2	0
2022-02-15	155	Dead	2	3	0
2022-02-15	155	LG76	2	1	0
2022-02-15	155	LG76	2	2	0.005
2022-02-15	155	LG76	2	3	0.008
2022-02-15	155	LG80	2	1	0.605
2022-02-15	155	LG80	2	2	0.619
2022-02-15	155	LG80	2	3	0.589
2022-02-15	152	Chill	3	1	0.523
2022-02-15	152	Chill	3	2	0.551
2022-02-15	152	Chill	3	3	0.569
2022-02-15	152	Control	3	1	0.654
2022-02-15	152	Control	3	2	0.658
2022-02-15	152	Control	3	3	0.657
2022-02-15	152	Dead	3	1	0
2022-02-15	152	Dead	3	2	0
2022-02-15	152	Dead	3	3	0
2022-02-15	152	LG76	3	1	0.65
2022-02-15	152	LG76	3	2	0.653
2022-02-15	152	LG76	3	3	0.663
2022-02-15	152	LG80	3	1	0
2022-02-15	152	LG80	3	2	0
2022-02-15	152	LG80	3	3	0
2022-02-15	153	Chill	3	1	0.546
2022-02-15	153	Chill	3	2	0.552
2022-02-15	153	Chill	3	3	0.485
2022-02-15	153	Control	3	1	0.661
2022-02-15	153	Control	3	2	0.654
2022-02-15	153	Control	3	3	0.701
2022-02-15	153	Dead	3	1	0.125
2022-02-15	153	Dead	3	2	0
2022-02-15	153	Dead	3	3	0.037
2022-02-15	153	LG76	3	1	0
2022-02-15	153	LG76	3	2	0.043
2022-02-15	153	LG76	3	3	0
2022-02-15	153	LG80	3	1	0.172
2022-02-15	153	LG80	3	2	0.155
2022-02-15	153	LG80	3	3	0.271
2022-02-15	154	Chill	3	1	0.605
2022-02-15	154	Chill	3	2	0.587
2022-02-15	154	Chill	3	3	0.685
2022-02-15	154	Control	3	1	0.671
2022-02-15	154	Control	3	2	0.673
2022-02-15	154	Control	3	3	0.674
2022-02-15	154	Dead	3	1	0.034
2022-02-15	154	Dead	3	2	0
2022-02-15	154	Dead	3	3	0
2022-02-15	154	LG76	3	1	0.625
2022-02-15	154	LG76	3	2	0.608
2022-02-15	154	LG76	3	3	0.637
2022-02-15	154	LG80	3	1	0.574
2022-02-15	154	LG80	3	2	0.641
2022-02-15	154	LG80	3	3	0.634
2022-02-15	155	Chill	3	1	0.644
2022-02-15	155	Chill	3	2	0.652
2022-02-15	155	Chill	3	3	0.662
2022-02-15	155	Control	3	1	0.669
2022-02-15	155	Control	3	2	0.658
2022-02-15	155	Control	3	3	0.668
2022-02-15	155	Dead	3	1	0
2022-02-15	155	Dead	3	2	0
2022-02-15	155	Dead	3	3	0
2022-02-15	155	LG76	3	1	0.143
2022-02-15	155	LG76	3	2	0
2022-02-15	155	LG76	3	3	0
2022-02-15	155	LG80	3	1	0.629
2022-02-15	155	LG80	3	2	0.615
2022-02-15	155	LG80	3	3	0.622
2022-02-15	152	LG76	4	1	0.548
2022-02-15	152	LG76	4	2	0.556
2022-02-15	152	LG76	4	3	0.547
2022-02-15	152	LG80	4	1	0.576
2022-02-15	152	LG80	4	2	0.572
2022-02-15	152	LG80	4	3	0.58
2022-02-15	153	LG76	4	1	0.559
2022-02-15	153	LG76	4	2	0.571
2022-02-15	153	LG76	4	3	0.67
2022-02-15	153	LG80	4	1	0.519
2022-02-15	153	LG80	4	2	0.534
2022-02-15	153	LG80	4	3	0.569
2022-02-15	154	LG76	4	1	0.59
2022-02-15	154	LG76	4	2	0.575
2022-02-15	154	LG76	4	3	0.615
2022-02-15	154	LG80	4	1	0.561
2022-02-15	154	LG80	4	2	0.567
2022-02-15	154	LG80	4	3	0.606
2022-02-15	155	LG76	4	1	0.628
2022-02-15	155	LG76	4	2	0.596
2022-02-15	155	LG76	4	3	0.619
2022-02-15	155	LG80	4	1	0.54
2022-02-15	155	LG80	4	2	0.549
2022-02-15	155	LG80	4	3	0.578
